# Supplementary material
Source: ML conference proceedings conference paper supplement (https://openreview.net/forum?id=kEPpD7yETM)
Supplement: supplementary_material [file attachment]

## Sheet: gpt3.5-16k
Log Name	Population Block Ratio	Resource Utilization Ratio	Average Population Utilization	Tech Rate
game_20240122_143021_0	0.0191147	4026.46	0.782391	0.309524
game_20240122_143021_1	0.0263415	5085.91	0.794584	0.333333
game_20240122_143021_2	0.0295434	3784.69	0.680067	0.47619
game_20240122_143021_3	0.0487805	8372.46	0.824091	0.380952
game_20240122_143021_4	0.0189189	10482.3	0.791203	0.595238
game_20240122_143021_5	0.133333	13023	0.692773	0.52381
game_20240122_143021_6	0.143025	4072.11	0.711873	0.547619
game_20240122_143021_7	0.136259	20772.8	0.843916	0.5
game_20240122_143021_8	0.0516796	2580.75	0.661838	0.380952
game_20240122_143021_9	0.174888	6559.09	0.825557	0.428571
	0.0781884	7875.95	0.760829	0.447619

## Sheet: GPT4-Tubor
Log Name	Population Block Ratio	Resource Utilization Ratio	Average Population Utilization	Tech Rate
game_20240131_121713_0	0.0209877	8244.61	0.60327	0.190476
game_20240131_174553_1	0.0502577	3399.35	0.733578	0.333333
game_20240131_174553_2	0.0498891	3838.54	0.835105	0.428571
game_20240131_174553_3	0.0141911	8801.73	0.777732	0.452381
game_20240131_174553_4	0.0158265	17109.9	0.712535	0.357143
game_20240131_174553_5	0.051306	8446.23	0.654733	0.309524
	0.033743	8306.72	0.719492	0.345238

## Sheet: gemini-pro
Log Name	Population Block Ratio	Resource Utilization Ratio	Average Population Utilization	Tech Rate
game_20240122_113812_0	0.0184941	6844.14	0.716381	0.285714
game_20240122_113812_1	0.0153959	12856.5	0.542935	0.357143
game_20240122_113812_2	0.0696662	3690.09	0.676281	0.261905
game_20240122_113812_3	0.0482955	6387.31	0.736415	0.357143
game_20240122_113812_4	0.0267241	13011.5	0.520424	0.238095
game_20240122_113812_5	0.0227074	8399.86	0.685953	0.309524
game_20240122_113812_6	0.0113809	13608.9	0.693253	0.333333
game_20240122_113812_7	0.0111876	5112.12	0.618924	0.380952
game_20240122_113812_8	0.0804077	7988.6	0.654467	0.285714
game_20240122_113812_9	0.0145138	14947.4	0.765992	0.357143
	0.0318773	9284.64	0.661103

## Sheet: glm4
Log Name	Population Block Ratio	Resource Utilization Ratio	Average Population Utilization	Tech Rate
game_20240120_222127_0	0.0397506	1589.88	0.787632	0.285714
game_20240120_222127_1	0.0276074	3854.37	0.688937	0.404762
game_20240120_222127_2	0.0233463	3541.33	0.554447	0.214286
game_20240121_140647_0	0.0346687	3710.78	0.564249	0.285714
game_20240121_140647_1	0.0162602	3592.69	0.6193	0.261905
game_20240121_140647_2	0.0385627	2559.92	0.698044	0.380952
game_20240121_140647_3	0.0242634	3315.58	0.70266	0.285714
game_20240121_223531_0	0.0442986	1924.31	0.80261	0.238095
game_20240121_223531_1	0.0267011	4270.14	0.689706	0.285714
game_20240121_223531_2	0.0521008	2956.12	0.536764	0.261905
	0.032756	3131.51	0.664435	0.290476

## Sheet: llam2-7b
Log Name	Population Block Ratio	Resource Utilization Ratio	Average Population Utilization	Tech Rate
game_20240129_192241_0	0.00965251	2442.71	0.554812	0.190476
game_20240129_192241_1	0.0149893	11900.6	0.660158	0.142857
game_20240129_192241_2	0.00431965	14376.5	0.627123	0.0238095
game_20240129_192241_3	0.122291	17155.6	0.439956	0.0238095
game_20240129_201209_0	0.034632	5036.01	0.559519	0.166667
game_20240129_201209_1	0.130548	10197.7	0.679472	0.0238095
game_20240129_201209_2	0.00147275	18046.2	0.509056	0.0238095
game_20240129_201209_3	0.0492021	19885.6	0.587607	0.0952381
game_20240129_210902_0	0	10348.1	0.539941	0.119048
game_20240129_210902_1	0.0422535	11817.9	0.598684	0.0952381
game_20240129_210902_2	0.119403	13876.1	0.678069	0.0238095
game_20240129_210902_3	0.0343053	12462	0.468278	0.0952381
	0.0469225	12295.4	0.575223	0.0853175

## Sheet: claude2.1
Log Name	Population Block Ratio	Resource Utilization Ratio	Average Population Utilization	Tech Rate
game_20240108_131758_0	0.0211913	9851.76	0.681101	0.452381
game_20240108_131758_3	0.0373312	8124.67	0.744585	0.428571
game_20240108_163750_1	0.016163	17226.6	0.543591	0.380952
game_20240127_160825_0	0.0174029	1559.03	0.616219	0.5
game_20240127_160825_1	0.010101	5425.02	0.700336	0.404762
game_20240127_220608_0	0.0203349	4923.67	0.613675	0.380952
game_20240127_220608_1	0.0187218	40487	0.645006	0.5
game_20240128_111235_0	0.0299184	3594.97	0.600447	0.404762
game_20240128_111235_1	0.0262989	6617.9	0.794585	0.428571
	0.0219404	10867.9	0.659949	0.431217

## Sheet: qwen7b
Log Name	Population Block Ratio	Resource Utilization Ratio	Average Population Utilization	Tech Rate
game_20240129_170251_0	0.0288612	12887.9	0.622424	0.333333
game_20240129_170251_1	0.0845948	17604.4	0.828404	0.357143
game_20240129_170251_2	0.073509	4569.92	0.596432	0.238095
game_20240129_170251_3	0.0279965	15872.2	0.762518	0.428571
game_20240129_172648_0	0.0798514	13457.9	0.840977	0.333333
game_20240129_172648_1	0.0107143	7489.15	0.667005	0.333333
game_20240129_172648_2	0.0166503	11914.4	0.634239	0.285714
game_20240129_172648_3	0.0364697	21496.4	0.849165	0.285714
game_20240129_181000_0	0.0258373	17982.7	0.80227	0.309524
game_20240129_181000_1	0.0750988	7405.8	0.82276	0.380952
game_20240129_181000_2	0.0238645	12773.5	0.566786	0.261905
game_20240129_181000_3	0.0221239	3863.9	0.699754	0.309524
	0.042131	12276.5	0.724394	0.321429

## Sheet: qwen1.8b
Log Name	Population Block Ratio	Resource Utilization Ratio	Average Population Utilization	Tech Rate
game_20240126_133738_0	0.0840841	3097.53	0.900827	0.238095
game_20240126_133738_1	0.0163009	23302.1	0.575184	0.190476
game_20240126_133738_2	0.0504528	4661.33	0.580354	0.214286
game_20240126_133738_3	0.0196672	3735.54	0.885591	0.190476
game_20240126_133738_4	0.017452	50348.5	0.679194	0.166667
game_20240126_133738_5	0.0347044	18263	0.791813	0.238095
game_20240126_133738_6	0.0673653	2197.63	0.854364	0.238095
game_20240126_133738_7	0.0283688	7900.18	0.871547	0.238095
game_20240126_133738_8	0.0107143	11478	0.491444	0.190476
game_20240126_133738_9	0.0549618	3277.89	0.876445	0.190476
	0.0384072	12826.2	0.750676	0.209524

## Sheet: glm3-6b
Log Name	Population Block Ratio	Resource Utilization Ratio	Average Population Utilization	Tech Rate
game_20240104_123325_-1	0.00370714	1615.27	0.56504	0.571429
game_20240126_175442_0	0.036	10833	0.870003	0.190476
game_20240126_175442_1	0.0961538	6076.64	0.847761	0.285714
game_20240129_155305_1	0.0559322	56473	0.670643	0.0952381
game_20240129_155305_2	0.0576408	6865.23	0.681051	0.0952381
game_20240129_155305_3	0.0857947	8809.17	0.668397	0.0952381
game_20240129_155305_6	0.0495868	14588.7	0.61662	0.0952381
game_20240129_155305_7	0.0364004	59733.7	0.60697	0.0952381
game_20240129_155305_8	0.0186246	104068	0.558589	0.0952381
game_20240129_155305_9	0.0881671	34497.9	0.462365	0.0952381
	0.0528007	30356	0.654744	0.171429
