# Supplementary material
Source: ML conference proceedings conference paper supplement (https://openreview.net/forum?id=kEPpD7yETM)
Supplement: supplementary_material [file glm4.xlsx]

## Sheet: Sheet1
Log Name	Population Block Ratio	Resource Utilization Ratio	Average Population Utilization	Tech Rate	Last Supply Used
game_20240120_222127_0	0.0397506	1589.88	0.787632	0.285714	189
game_20240120_222127_1	0.0276074	3854.37	0.688937	0.404762	99
game_20240120_222127_2	0.0233463	3541.33	0.554447	0.214286	0
game_20240121_140647_0	0.0346687	3710.78	0.564249	0.285714	0
game_20240121_140647_1	0.0162602	3592.69	0.6193	0.261905	0
game_20240121_140647_2	0.0385627	2559.92	0.698044	0.380952	0
game_20240121_140647_3	0.0242634	3315.58	0.70266	0.285714	0
game_20240121_223531_0	0.0442986	1924.31	0.80261	0.238095	149
game_20240121_223531_1	0.0267011	4270.14	0.689706	0.285714	0
game_20240121_223531_2	0.0521008	2956.12	0.536764	0.261905	0
	0.032756	3131.51	0.664435	0.290476
