# Supplementary material
Source: ML conference proceedings conference paper supplement (https://openreview.net/forum?id=kEPpD7yETM)
Supplement: supplementary_material [file gpt.xlsx]

## Sheet: Sheet1
Log Name	Population Block Ratio	Resource Utilization Ratio	Average Population Utilization	Tech Rate	Last Supply Used
game_20240122_143021_0	0.0191147	4026.46	0.782391	0.309524	193
game_20240122_143021_1	0.0263415	5085.91	0.794584	0.333333	186
game_20240122_143021_2	0.0295434	3784.69	0.680067	0.47619	0
game_20240122_143021_3	0.0487805	8372.46	0.824091	0.380952	200
game_20240122_143021_4	0.0189189	10482.3	0.791203	0.595238	175
game_20240122_143021_5	0.133333	13023	0.692773	0.52381	0
game_20240122_143021_6	0.143025	4072.11	0.711873	0.547619	0
game_20240122_143021_7	0.136259	20772.8	0.843916	0.5	183
game_20240122_143021_8	0.0516796	2580.75	0.661838	0.380952	0
game_20240122_143021_9	0.174888	6559.09	0.825557	0.428571	2
	0.0781884	7875.95	0.760829	0.447619
