# Supplementary material
Source: ML conference proceedings conference paper supplement (https://openreview.net/forum?id=kEPpD7yETM)
Supplement: supplementary_material [file log_analysis.xlsx]

## Sheet: Sheet1
Log Name	Population Block Ratio	Resource Utilization Ratio	Average Population Utilization	Tech Rate	Last Supply Used
game_20240126_133738_0	0.0840841	3097.53	0.900827	0.238095	200
game_20240126_133738_1	0.0163009	23302.1	0.575184	0.190476	0
game_20240126_133738_2	0.0504528	4661.33	0.580354	0.214286	0
game_20240126_133738_3	0.0196672	3735.54	0.885591	0.190476	200
game_20240126_133738_4	0.017452	50348.5	0.679194	0.166667	0
game_20240126_133738_5	0.0347044	18263	0.791813	0.238095	200
game_20240126_133738_6	0.0673653	2197.63	0.854364	0.238095	200
game_20240126_133738_7	0.0283688	7900.18	0.871547	0.238095	200
game_20240126_133738_8	0.0107143	11478	0.491444	0.190476	0
game_20240126_133738_9	0.0549618	3277.89	0.876445	0.190476	200
