# Supplementary material
Source: ML conference proceedings conference paper supplement (https://openreview.net/forum?id=kEPpD7yETM)
Supplement: supplementary_material [file log_analysis.xlsx]

## Sheet: Sheet1
Log Name	Population Block Ratio	Resource Utilization Ratio	Average Population Utilization	Tech Rate	Last Supply Used
game_20240108_131758_0	0.0211913	9851.76	0.681101	0.452381	91
game_20240108_131758_3	0.0373312	8124.67	0.744585	0.428571	152
game_20240108_163750_1	0.016163	17226.6	0.543591	0.380952	0
game_20240127_160825_0	0.0174029	1559.03	0.616219	0.5	0
game_20240127_160825_1	0.010101	5425.02	0.700336	0.404762	1
game_20240127_220608_0	0.0203349	4923.67	0.613675	0.380952	0
game_20240127_220608_1	0.0187218	40487	0.645006	0.5	122
game_20240128_111235_0	0.0299184	3594.97	0.600447	0.404762	0
game_20240128_111235_1	0.0262989	6617.9	0.794585	0.428571	12
