# Supplementary material
Source: ML conference proceedings conference paper supplement (https://openreview.net/forum?id=kEPpD7yETM)
Supplement: supplementary_material [file log_analysis.xlsx]

## Sheet: Sheet1
Log Name	Population Block Ratio	Resource Utilization Ratio	Average Population Utilization	Tech Rate	Last Supply Used
game_20240129_170251_0	0.0288612	12887.9	0.622424	0.333333	0
game_20240129_170251_1	0.0845948	17604.4	0.828404	0.357143	200
game_20240129_170251_2	0.073509	4569.92	0.596432	0.238095	0
game_20240129_170251_3	0.0279965	15872.2	0.762518	0.428571	199
game_20240129_172648_0	0.0798514	13457.9	0.840977	0.333333	200
game_20240129_172648_1	0.0107143	7489.15	0.667005	0.333333	6
game_20240129_172648_2	0.0166503	11914.4	0.634239	0.285714	0
game_20240129_172648_3	0.0364697	21496.4	0.849165	0.285714	200
game_20240129_181000_0	0.0258373	17982.7	0.80227	0.309524	200
game_20240129_181000_1	0.0750988	7405.8	0.82276	0.380952	177
game_20240129_181000_2	0.0238645	12773.5	0.566786	0.261905	0
game_20240129_181000_3	0.0221239	3863.9	0.699754	0.309524	1
	0.042131	12276.5	0.724394	0.321429
