# Supplementary material
Source: ML conference proceedings conference paper supplement (https://openreview.net/forum?id=kEPpD7yETM)
Supplement: supplementary_material [file log_analysis.xlsx]

## Sheet: Sheet1
Log Name	Population Block Ratio	Resource Utilization Ratio	Average Population Utilization	Tech Rate	Last Supply Used
game_20240131_121713_0	0.0209877	8244.61	0.60327	0.190476	2
game_20240131_174553_1	0.0502577	3399.35	0.733578	0.333333	4
game_20240131_174553_2	0.0498891	3838.54	0.835105	0.428571	200
game_20240131_174553_3	0.0141911	8801.73	0.777732	0.452381	149
game_20240131_174553_4	0.0158265	17109.9	0.712535	0.357143	135
game_20240131_174553_5	0.051306	8446.23	0.654733	0.309524	1
	0.033743	8306.72	0.719492	0.345238
