# Supplementary material
Source: ML conference proceedings conference paper supplement (https://openreview.net/forum?id=kEPpD7yETM)
Supplement: supplementary_material [file log_analysis.xlsx]

## Sheet: Sheet1
Log Name	Population Block Ratio	Resource Utilization Ratio	Average Population Utilization	Tech Rate	Last Supply Used
game_20240129_192241_0	0.00965251	2442.71	0.554812	0.190476	0
game_20240129_192241_1	0.0149893	11900.6	0.660158	0.142857	6
game_20240129_192241_2	0.00431965	14376.5	0.627123	0.0238095	13
game_20240129_192241_3	0.122291	17155.6	0.439956	0.0238095	0
game_20240129_201209_0	0.034632	5036.01	0.559519	0.166667	0
game_20240129_201209_1	0.130548	10197.7	0.679472	0.0238095	16
game_20240129_201209_2	0.00147275	18046.2	0.509056	0.0238095	12
game_20240129_201209_3	0.0492021	19885.6	0.587607	0.0952381	0
game_20240129_210902_0	0	10348.1	0.539941	0.119048	2
game_20240129_210902_1	0.0422535	11817.9	0.598684	0.0952381	0
game_20240129_210902_2	0.119403	13876.1	0.678069	0.0238095	16
game_20240129_210902_3	0.0343053	12462	0.468278	0.0952381	0
	0.0469225	12295.4	0.575223	0.0853175
