# Supplementary material
Source: ML conference proceedings conference paper supplement (https://openreview.net/forum?id=kEPpD7yETM)
Supplement: supplementary_material [file log_analysis.xlsx]

## Sheet: Sheet1
Log Name	Population Block Ratio	Resource Utilization Ratio	Average Population Utilization	Tech Rate	Last Supply Used
game_20240104_123325_-1	0.00370714	1615.27	0.56504	0.571429	0
game_20240126_175442_0	0.036	10833	0.870003	0.190476	200
game_20240126_175442_1	0.0961538	6076.64	0.847761	0.285714	200
game_20240129_155305_1	0.0559322	56473	0.670643	0.0952381	0
game_20240129_155305_2	0.0576408	6865.23	0.681051	0.0952381	6
game_20240129_155305_3	0.0857947	8809.17	0.668397	0.0952381	0
game_20240129_155305_6	0.0495868	14588.7	0.61662	0.0952381	0
game_20240129_155305_7	0.0364004	59733.7	0.60697	0.0952381	0
game_20240129_155305_8	0.0186246	104068	0.558589	0.0952381	0
game_20240129_155305_9	0.0881671	34497.9	0.462365	0.0952381	0
