# Supplementary material
Source: ML conference proceedings conference paper supplement (https://openreview.net/forum?id=kEPpD7yETM)
Supplement: supplementary_material [file log_analysis.xlsx]

## Sheet: Sheet1
Log Name	Population Block Ratio	Resource Utilization Ratio	Average Population Utilization	Tech Rate	Last Supply Used
game_20240122_113812_0	0.0184941	6844.14	0.716381	0.285714	10
game_20240122_113812_1	0.0153959	12856.5	0.542935	0.357143	0
game_20240122_113812_2	0.0696662	3690.09	0.676281	0.261905	8
game_20240122_113812_3	0.0482955	6387.31	0.736415	0.357143	3
game_20240122_113812_4	0.0267241	13011.5	0.520424	0.238095	0
game_20240122_113812_5	0.0227074	8399.86	0.685953	0.309524	0
game_20240122_113812_6	0.0113809	13608.9	0.693253	0.333333	139
game_20240122_113812_7	0.0111876	5112.12	0.618924	0.380952	0
game_20240122_113812_8	0.0804077	7988.6	0.654467	0.285714	0
game_20240122_113812_9	0.0145138	14947.4	0.765992	0.357143	198
	0.0318773	9284.64	0.661103
